# Supplementary material for: Structure-Based Understanding of ABCA3 Variants
Source: MDPI journal article supplement (doi:10.3390/ijms221910282), 2021-09-24
Supplement: s1 [file s1]

**Table S1. Variant status, phenotype and references of all variants selected in NBDs, RDs and IHs.**

| Nomenclature                                |                               |             | Functional studies   |       | Genotypes and outcomes            |                                       |                                              |                                                                         | References                          |
|---------------------------------------------|-------------------------------|-------------|----------------------|-------|-----------------------------------|---------------------------------------|----------------------------------------------|-------------------------------------------------------------------------|-------------------------------------|
| cDNA                                        | Protein                       | rsID        | Yes/No (ref)         | Class | Nbr of patients                   | Status                                | Mutation on the second allele                | Outcome                                                                 |                                     |
| Variants reported in the IH1 motif          |                               |             |                      |       |                                   |                                       |                                              |                                                                         |                                     |
| c.42C>G                                     | p.(Asn14Lys)<br><b>N14K</b>   | -           | N                    | -     | 2 siblings                        | Homozygous                            |                                              | Death (8y and 21y)                                                      | [1]                                 |
| c.53A>G                                     | p.(Gln18Arg)<br><b>Q18R</b>   | -           | N                    | -     | 1 patient                         | Compound Heterozygous                 | R43C-P1653L                                  | LT (3y)                                                                 | [1]                                 |
| c.59G>T                                     | p.(Arg20Leu)<br><b>R20L</b>   | rs201777730 | N                    | -     | 6 patients                        | Compound Heterozygous                 | c.4483del25                                  | RDS – Death < 1y                                                        | [2]                                 |
|                                             |                               |             |                      |       |                                   |                                       | L960S                                        | ILD – Alive (8y)                                                        | [3]                                 |
|                                             |                               |             |                      |       |                                   |                                       | c.2646dup                                    | RDS – Alive (10mo)                                                      | [4]                                 |
|                                             |                               |             |                      |       |                                   |                                       | W179C                                        | ILD – Alive (15y)                                                       | [5]                                 |
|                                             |                               |             |                      |       |                                   |                                       | c.3544delC                                   | Death (1.3yr)                                                           | [1]                                 |
| W179C-P770L                                 | Death (10y)                   | [1]         |                      |       |                                   |                                       |                                              |                                                                         |                                     |
| Variants reported in the ICL1 and IH2 motif |                               |             |                      |       |                                   |                                       |                                              |                                                                         |                                     |
| c.863G>A                                    | p.(Arg288Lys)<br><b>R288K</b> | rs117603931 | Y ( [6]–[8] )        | III   | One of the most frequent variants | Compound Heterozygous or Homozygous † |                                              | Variable<br>Homoz : RDS – Death < 1y                                    | [1], [6], [9]–[12]                  |
| c.875A>T                                    | p.(Glu292Val)<br><b>E292V</b> | rs149989682 | Y ( [7], [13]–[16] ) | II    | One of the most frequent variants | Compound Heterozygous or Homozygous   |                                              | Variable<br>Homoz : RDS – Alive (2y) or RDS – Death < 1y or ILD – Alive | [1], [3], [5], [10]–[12], [17]–[24] |
| Variants reported in the NBD1 motif         |                               |             |                      |       |                                   |                                       |                                              |                                                                         |                                     |
| c.1675G>A                                   | p.(Gly559Arg)<br><b>G559R</b> | rs976333358 | N                    | -     | 1 patient                         | Compound Heterozygous                 | T1582S                                       | ILD – Alive (79y)                                                       | [19]                                |
| c.1702A>G                                   | p.(Asn568Asp)<br><b>N568D</b> | rs121909184 | Y ( [25]–[30] )      | II    | 2 patients                        | Compound Heterozygous                 | G1438V<br>G1438V                             | Death < 1y<br>Death after LT (< 1y)                                     | [1]<br>[1], [31]                    |
| c.1736T>C                                   | p.(Leu579Pro)<br><b>L579P</b> | -           | N                    | -     | 1 patient                         | Compound Heterozygous                 | c.3812delG                                   | RDS – Death < 1y                                                        | [9]                                 |
| c.1880T>A                                   | p.(Leu627His)<br><b>L627H</b> | -           | N                    | -     | 1 patient                         | Compound Heterozygous                 | c.1729_1730delTC                             | Death < 1y                                                              | [1]                                 |
| c.2068G>A                                   | p.(Glu690Lys)<br><b>E690K</b> | -           | Y ( [15] )           | II    | 5 patients                        | Compound Heterozygous                 | E292V (2 siblings)<br>c.3863-98C>T<br>R1482W | ILD – Alive (11y and 9y)<br>RDS – Death < 1y<br>Death < 1y              | [17]<br>[32]                        |
|                                             |                               |             |                      |       |                                   | Homozygous                            |                                              | LT (< 1y)                                                               | [1]                                 |
| c.2069A>G                                   | p.(Glu690Gly)<br><b>E690G</b> | -           | N                    | -     | 1 patient                         | Compound Heterozygous                 | R280C                                        | ILD – Alive (13y)                                                       | [33]                                |
| c.2074A>C                                   | p.(Thr692Pro)<br><b>T692P</b> | -           | N                    | -     | 1 patient                         | Compound Heterozygous                 | P766S-L960F                                  | Death < 1y                                                              | [1]                                 |

|                                            |                                 |              |                                |    |            |                          |                      |                                                      |              |
|--------------------------------------------|---------------------------------|--------------|--------------------------------|----|------------|--------------------------|----------------------|------------------------------------------------------|--------------|
| c.2078C<br>>T                              | p.(Ser693Leu) †<br><b>S693L</b> | rs200835546  | Y ( [34] )                     | II | 3 patients | Compound<br>Heterozygous | N1418S (twins)<br>NA | Alive<br>ILD – Alive (3y)                            | [1]<br>[6]   |
| c.2086G<br>>A                              | p.(Asp696Asn)<br><b>D696N</b>   | rs193920904  | N                              | -  | 2 siblings | Compound<br>Heterozygous | c.1521delCA          | ILD – Alive (12mo)<br>(sibling: no symptoms at 4y)   | [35]         |
| c.2125C<br>>T                              | p.(Arg709Trp)<br><b>R709W</b>   | rs148671332  | N                              | -  | 2 patients | Compound<br>Heterozygous | NA<br>I1193M         | ILD - Alive<br>ILD – Alive (36y)                     | [36]<br>[11] |
| c.2233G<br>>A                              | p.(Gly745Arg)<br><b>G745R</b>   | -            | N                              | -  | 1 patient  | Compound<br>Heterozygous | P766S-L960F          | Death < 1y                                           | [1]          |
| <b>Variants reported in the RD1 motif</b>  |                                 |              |                                |    |            |                          |                      |                                                      |              |
| c.2279T><br>G                              | p.(Met760Arg)<br><b>M760R</b>   | -            | Y ( [8], [37] )                | I  | 1 patient  | Compound<br>Heterozygous | R208W                | Severe ILD - Death after LT<br>(8y)                  | [2]          |
| c.2282C<br>>T                              | p.(Thr761Met)<br><b>T761M</b>   | rs369081312  | N                              | -  | 1 patient  | Compound<br>Heterozygous | A1362V               | Chronic lung disease – Alive<br>(17mo)               | [38]         |
| c.2296C<br>>T                              | p.(Pro766Ser) †<br><b>P766S</b> | rs45592239   | N                              | -  | 7 patients | Compound<br>Heterozygous | 1729delTC            | RDS – LT (3mo)                                       | [39]         |
|                                            |                                 |              |                                |    |            |                          | T1472R               | ILD – Alive (4y)                                     | [5]          |
|                                            |                                 |              |                                |    |            |                          | G745R                |                                                      |              |
|                                            |                                 |              |                                |    |            |                          | V1399M               | Death < 1y                                           | [1]          |
|                                            |                                 |              |                                |    |            |                          | T692P                |                                                      |              |
| c.2309C<br>>T                              | p.(Pro770Leu) †<br><b>P770L</b> | rs143929832  | N                              | -  | 3 patients | Compound<br>Heterozygous | R288K (twins)        | RDS – Death < 1y                                     | [6]          |
|                                            |                                 |              |                                |    |            |                          | c.1382_1383delTG     | LT < 1y                                              |              |
|                                            |                                 |              |                                |    |            |                          | R20L                 | Death (10y)                                          | [1]          |
| c.2333A><br>G                              | p.(His778Arg) †<br><b>H778R</b> | rs34912779   | N                              | -  | 2 siblings | Compound<br>Heterozygous | D219E                | Death < 1y                                           |              |
| c.2393T><br>C                              | p.(Leu798Pro)<br><b>L798P</b>   | -            | N                              | -  | 1 patient  | Compound<br>Heterozygous | A1528V               | mild RDS – Alive (9y)<br>(sibling: RDS – Death < 1y) | [40]         |
|                                            |                                 |              |                                |    |            |                          | R1612P               | RDS – Death < 1y                                     | [41]         |
| <b>Variants reported in the IH3 motif</b>  |                                 |              |                                |    |            |                          |                      |                                                      |              |
| c.2741A><br>G                              | p.(Lys914Arg)<br><b>K914R</b>   | rs763862811  | N                              | -  | 3 patients | Compound<br>Heterozygous | c.3715_3716insGG     | ILD – Alive (5y)                                     | [42]         |
|                                            |                                 |              |                                |    |            |                          | GGGG (2 siblings)    | (sibling: Death < 1y)                                |              |
| c.2745G<br>>C                              | p.(Lys915Asn)<br><b>K915N</b>   | rs1459105468 | N                              | -  | 1 patient  | Compound<br>Heterozygous | Y758X                | LT < 1y                                              | [43]         |
|                                            |                                 |              |                                |    |            |                          |                      | RDS – Alive (22mo)                                   | [21]         |
| <b>Variants reported in the IH4 motif</b>  |                                 |              |                                |    |            |                          |                      |                                                      |              |
| c.3392A><br>G                              | p.(Gln1131Arg)<br><b>Q1131R</b> | -            | N                              | -  | 1 patient  | Compound<br>Heterozygous | Q1591P               | ILD – Alive (13y)                                    | [1], [31]    |
| <b>Variants reported in the NBD2 motif</b> |                                 |              |                                |    |            |                          |                      |                                                      |              |
| c.4157T><br>C                              | p.(Leu1386Pro)<br><b>L1386P</b> | -            | N                              | -  | 1 patient  | Compound<br>Heterozygous | L269dup              | Death < 1y                                           | [1]          |
| c.4164G<br>>C                              | p.(Lys1388Asn)<br><b>K1388N</b> | -            | Y ( [8], [16],<br>[37], [44] ) | II | 1 patient  | Homozygous               |                      | RDS – Death < 1y                                     | [44]         |
| c.4195G<br>>A                              | p.(Val1399Met)<br><b>V1399M</b> | rs763166660  | Y ( [13] )                     | II | 3 patients | Compound<br>Heterozygous | W1554X               | RDS – Death < 1y                                     | [45]         |
|                                            |                                 |              |                                |    |            |                          | Q1589X-R280C         | LT < 1y                                              |              |
|                                            |                                 |              |                                |    |            |                          | P766S-L960F          | Death < 1y                                           | [1]          |

|           |                                   |              |                  |    |            |                       |                            |                                              |             |
|-----------|-----------------------------------|--------------|------------------|----|------------|-----------------------|----------------------------|----------------------------------------------|-------------|
| c.4231T>C | p.(Cys1411Arg)<br><b>C1411R</b>   | -            | N                | -  | 1 patient  | Homozygous            |                            | Death < 1y                                   | [1]         |
| c.4253A>G | p.(Asn1418Ser)<br><b>N1418S</b>   | rs147036502  | N                | -  | 3 patients | Compound Heterozygous | NA<br>R288K-S693L (twins)  | ILD – Alive                                  | [32]        |
| c.4258G>C | p.(Ala1420Pro)<br><b>A1420P</b>   | rs1167324185 | N                | -  | 2 siblings | Homozygous            |                            | Death < 1y - NA                              | [1]         |
| c.4261G>A | p.(Gly1421Arg)<br><b>G1421R</b>   | rs776453529  | Y ( [14], [37] ) | II | 1 patient  | Compound Heterozygous | P193S                      | RDS – LT – Death <1y                         | [11]        |
| c.4268C>T | p.(Thr1423Ile)<br><b>T1423I</b>   | rs764069673  | N                | -  | 1 patient  | Compound Heterozygous | R208W                      | RDS – Death < 1y                             | [20]        |
| c.4313G>T | p.(Gly1438Val)<br><b>G1438V</b>   | -            | N                | -  | 2 patients | Compound Heterozygous | N568D<br>N568D             | Death < 1y<br>LT < 1y                        | [1]         |
| c.4376G>A | p.(Gly1459Asp)<br><b>G1459D</b>   | -            | N                | -  | 1 patient  | Compound Heterozygous | A414T                      | Death < 1y                                   | [1]         |
| c.4411A>G | p.(Met1471Val)<br><b>M1471V</b>   | rs754896003  | N                | -  | 1 patient  | Compound Heterozygous | E292V                      | Alive                                        | [1]         |
| c.4415C>G | p.(Thr1472Arg)<br><b>T1472R</b>   | -            | N                | -  | 1 patient  | Compound Heterozygous | L960F-P766S                | ILD – Alive (4y)                             | [5]         |
| c.4444C>T | p.(Arg1482Trp)<br><b>R1482W</b>   | rs892042868  | N                | -  | 4 patients | Compound Heterozygous | R43L<br>E690K              | RDS – Death < 1y<br>Death < 1y               | [20]        |
|           |                                   |              |                  |    |            |                       | IVS25-98 C>T (A54T in cis) | NA                                           | [1]         |
|           |                                   |              |                  |    |            |                       | G964S                      | ILD – Alive (26y)                            | [46]        |
| c.4451G>C | p.(Arg1484Pro)<br><b>R1484P</b>   | -            | N                | -  | 1 patient  | Compound Heterozygous | E292V                      | ILD – Death (61y)                            | [19]        |
| c.4483G>A | p.(Val1495Met)<br>† <b>V1495M</b> | rs141058709  | N                | -  | 1 patient  | Compound Heterozygous | c.4141_4142delCT           | Alive                                        | [1]         |
| c.4561C>T | p.(Arg1521Trp)<br><b>R1521W</b>   | rs760872079  | N                | -  | 2 patients | Compound Heterozygous | R208W<br>c.11112-20G>A     | ILD - Alive<br>NA                            | [36]<br>[1] |
| c.4583C>T | p.(Ala1528Val) †<br><b>A1528V</b> | -            | N                | -  | 2 siblings | Compound Heterozygous | H778R-L1252P               | mild RDS – Alive (sibling: RDS – Death < 1y) | [40]        |
| c.4615G>C | p.(Asp1539His)<br><b>D1539H</b>   | -            | N                | -  | 1 patient  | Compound Heterozygous | Y1291X                     | Death < 1y                                   | [1]         |
| c.4618G>A | p.(Glu1540Lys)<br><b>E1540K</b>   | rs968080956  | N                | -  | 1 patient  | Compound Heterozygous | c.3990_3991delGA           | Death < 1y                                   | [1]         |
| c.4648C>T | p.(Arg1550Trp)<br><b>R1550W</b>   | rs781422468  | N                | -  | 1 patient  | Compound Heterozygous | c.289insA                  | RDS – LT – Death <1y                         | [3]         |
| c.4658T>C | p.(Leu1553Pro)<br><b>L1553P</b>   | rs121909183  | Y ( [28] )       | I  | 2 siblings | Homozygous            |                            | RDS – Death < 1y                             | [31]        |
| c.4732G>A | p.(Glu1578Lys)<br><b>E1578K</b>   | rs1034626421 | N                | -  | 1 patient  | Compound Heterozygous | Q1591P                     | ILD – Alive (15y)                            | [3]         |
| c.4739T>C | p.(Leu1580Pro)<br><b>L1580P</b>   | -            | Y ( [26]–[28] )  | II | 2 siblings | Compound Heterozygous | c.4552insT                 | RDS – Death < 1y                             | [31]        |
| c.4745C>G | p.(Thr1582Ser)<br><b>T1582S</b>   | rs574182515  | N                | -  | 1 patient  | Compound Heterozygous | G559R                      | ILD – Alive (79y)                            | [19]        |
|           |                                   | -            | N                | -  | 4 patients |                       | c.384delC                  | RDS – Death < 1y                             | [36]        |

|                                           |                                   |             |          |   |            |                          |                                      |                                                            |                               |
|-------------------------------------------|-----------------------------------|-------------|----------|---|------------|--------------------------|--------------------------------------|------------------------------------------------------------|-------------------------------|
| c.4747C<br>>T                             | p.(Arg1583Trp)<br><b>R1583W</b>   |             |          |   |            | Compound<br>Heterozygous | R43C<br>c.1858_1862delAAC<br>TT      | RDS – Death < 1y<br>Death < 1y                             | [5]<br>[1]                    |
| c.4772A><br>C                             | p.(Gln1591Pro)<br><b>Q1591P</b>   | rs28936691  | Y ([28]) | I | 2 patients | Compound<br>Heterozygous | c.4483_4507del25<br>Q1131R<br>E1578K | PAP – Death < 1y<br>ILD – Alive (13y)<br>ILD – Alive (17y) | [38]<br>[1], [31]<br>[1], [3] |
| c.4784T><br>C                             | p.(Leu1595Pro)<br><b>L1595P</b>   | -           | N        | - | 1 patient  | Compound<br>Heterozygous | D253Y                                | RDS – LT (3mo)                                             | [39]                          |
| <b>Variants reported in the RD2 motif</b> |                                   |             |          |   |            |                          |                                      |                                                            |                               |
| c.4835G<br>>C                             | p.(Arg1612Pro)<br><b>R1612P</b>   | -           | N        | - | 1 patient  | Compound<br>Heterozygous | L798P                                | RDS – Death < 1y                                           | [41]                          |
| c.4958C<br>>T                             | p.(Pro1653Leu)<br>† <b>P1653L</b> | rs774227126 | N        | - | 1 patient  | Compound<br>Heterozygous | Q18R                                 | LT (3y)                                                    | [1]                           |

ILD: interstitial lung disease; RDS: respiratory distress syndrome; LT: Lung transplantation; PAP: pulmonary alveolar proteinosis.

† Complex alleles: R288K was identified in cis with the Q215K variant in double homozygous state, S693L was identified in cis with the R288K variant, P766S in cis with L960F, P770L in cis with W179C, H778R in cis with L1252P, V1495M in cis with V129M, P1653L in cis with R43C.

### Online Supplement References (Table S1)

- [1] J. A. Wambach *et al.*, « Genotype–Phenotype Correlations for Infants and Children with ABCA3 Deficiency », *Am J Respir Crit Care Med*, vol. 189, n° 12, p. 1538-1543, mai 2014, doi: 10.1164/rccm.201402-0342OC.
- [2] A. Prestridge *et al.*, « Persistent tachypnea and hypoxia in a 3-month-old term infant », *The Journal of Pediatrics*, vol. 149, n° 5, p. 702-706.e1, nov. 2006, doi: 10.1016/j.jpeds.2006.07.032.
- [3] M. L. Doan *et al.*, « Clinical, radiological and pathological features of ABCA3 mutations in children », *Thorax*, vol. 63, n° 4, p. 366-373, avr. 2008, doi: 10.1136/thx.2007.083766.
- [4] Don Hayes, « ABCA3 Transporter Deficiency », *Am J Respir Crit Care Med*, vol. 186, n° 8, p. 807-808, oct. 2012, doi: 10.1164/ajrccm.186.8.807a.
- [5] S. Turcu, E. Ashton, L. Jenkins, A. Gupta, et Q. Mok, « Genetic testing in children with surfactant dysfunction », *Archives of Disease in Childhood*, vol. 98, n° 7, p. 490-495, juill. 2013, doi: 10.1136/archdischild-2012-303166.
- [6] T. Wittmann *et al.*, « Increased Risk of Interstitial Lung Disease in Children with a Single R288K Variant of ABCA3 », *Molecular Medicine*, vol. 22, p. 183, 2016, doi: 10.2119/molmed.2015.00244.
- [7] J. A. Wambach *et al.*, « Functional Characterization of ATP-Binding Cassette Transporter A3 Mutations from Infants with Respiratory Distress Syndrome », *Am J Respir Cell Mol Biol*, vol. 55, n° 5, p. 716-721, juill. 2016, doi: 10.1165/rcmb.2016-0008OC.
- [8] U. Schindlbeck *et al.*, « ABCA3 missense mutations causing surfactant dysfunction disorders have distinct cellular phenotypes », *Human Mutation*, vol. 39, n° 6, p. 841-850, juin 2018, doi: 10.1002/humu.23416.

- [9] F. Brasch *et al.*, « Alteration of the Pulmonary Surfactant System in Full-Term Infants with Hereditary ABCA3 Deficiency », *Am J Respir Crit Care Med*, vol. 174, n° 5, p. 571-580, sept. 2006, doi: 10.1164/rccm.200509-1535OC.
- [10] D. Klay, T. W. Hoffman, A. M. Harmsze, J. C. Grutters, et C. H. M. van Moorsel, « Systematic review of drug effects in humans and models with surfactant-processing disease », *European Respiratory Review*, vol. 27, n° 149, sept. 2018, doi: 10.1183/16000617.0135-2017.
- [11] C. Kröner *et al.*, « Lung disease caused by ABCA3 mutations », *Thorax*, vol. 72, n° 3, p. 213-220, mars 2017, doi: 10.1136/thoraxjnl-2016-208649.
- [12] M. Copertino *et al.*, « A Child With Severe Pneumomediastinum and ABCA3 Gene Mutation: A Puzzling Connection », *Arch Bronconeumol*, vol. 48, n° 4, p. 139-140, avr. 2012, doi: 10.1016/j.arbr.2011.11.010.
- [13] J. Y. Hu *et al.*, « Functional characterization of four ATP-binding cassette transporter A3 gene (ABCA3) variants », *Human Mutation*, vol. 41, n° 7, p. 1298-1307, 2020, doi: <https://doi.org/10.1002/humu.24014>.
- [14] J. A. Wambach *et al.*, « Functional Genomics of ABCA3 Variants », *Am J Respir Cell Mol Biol*, vol. 63, n° 4, p. 436-443, juill. 2020, doi: 10.1165/rcmb.2020-0034MA.
- [15] Y. Matsumura, N. Ban, et N. Inagaki, « Aberrant catalytic cycle and impaired lipid transport into intracellular vesicles in ABCA3 mutants associated with nonfatal pediatric interstitial lung disease », *American Journal of Physiology - Lung Cellular and Molecular Physiology*, vol. 295, n° 4, p. L698-L707, oct. 2008, doi: 10.1152/ajplung.90352.2008.
- [16] S. Höppner *et al.*, « Quantification of volume and lipid filling of intracellular vesicles carrying the ABCA3 transporter », *Biochimica et Biophysica Acta (BBA) - Molecular Cell Research*, vol. 1864, n° 12, p. 2330-2335, déc. 2017, doi: 10.1016/j.bbamcr.2017.08.013.
- [17] J. E. Bullard, S. E. Wert, J. A. Whitsett, M. Dean, et L. M. Nogee, « ABCA3 Mutations Associated with Pediatric Interstitial Lung Disease », *Am J Respir Crit Care Med*, vol. 172, n° 8, p. 1026-1031, oct. 2005, doi: 10.1164/rccm.200503-504OC.
- [18] M. A. Coghlan *et al.*, « Sequencing of idiopathic pulmonary fibrosis-related genes reveals independent single gene associations », *BMJ Open Respiratory Research*, vol. 1, n° 1, p. e000057, déc. 2014, doi: 10.1136/bmjresp-2014-000057.
- [19] D. Klay, M. G. J. P. Platenburg, R. H. N. A. J. van Rijswijk, J. C. Grutters, et C. H. M. van Moorsel, « ABCA3 mutations in adult pulmonary fibrosis patients: a case series and review of literature », *Current Opinion in Pulmonary Medicine*, vol. 26, n° 3, p. 293-301, mai 2020, doi: 10.1097/MCP.0000000000000680.
- [20] M. Somaschini *et al.*, « Unexplained Neonatal Respiratory Distress Due to Congenital Surfactant Deficiency », *The Journal of Pediatrics*, vol. 150, n° 6, p. 649-653.e1, juin 2007, doi: 10.1016/j.jpeds.2007.03.008.
- [21] Si *et al.*, « Three Infants with Pathogenic Variants in the ABCA3 Gene: Presentation, Treatment and Clinical Course », *The Journal of Pediatrics*, déc. 2020, doi: 10.1016/j.jpeds.2020.12.055.

- [22] J. J. Soares *et al.*, « Childhood Interstitial Lung Diseases: An 18-year Retrospective Analysis », *Pediatrics*, vol. 132, n° 4, p. 684-691, oct. 2013, doi: 10.1542/peds.2013-1780.
- [23] R. Epaud, C. Delestrain, M. Louha, S. Simon, P. Fanen, et A. Tazi, « Combined pulmonary fibrosis and emphysema syndrome associated with ABCA3 mutations », *European Respiratory Journal*, vol. 43, n° 2, p. 638-641, févr. 2014, doi: 10.1183/09031936.00145213.
- [24] N. Akil et A. J. Fischer, « Surfactant deficiency syndrome in an infant with a C-terminal frame shift in ABCA3: A case report », *Pediatr Pulmonol*, vol. 53, n° 5, p. E12-E14, mai 2018, doi: 10.1002/ppul.23994.
- [25] N. Cheong *et al.*, « Functional and Trafficking Defects in ATP Binding Cassette A3 Mutants Associated with Respiratory Distress Syndrome », *J. Biol. Chem.*, vol. 281, n° 14, p. 9791-9800, juill. 2006, doi: 10.1074/jbc.M507515200.
- [26] S. Kinting, Y. Li, M. Forstner, F. Delhommel, M. Sattler, et M. Griese, « Potentiation of ABCA3 lipid transport function by ivacaftor and genistein », *J. Cell. Mol. Med.*, vol. 23, n° 8, p. 5225-5234, août 2019, doi: 10.1111/jcmm.14397.
- [27] Y. Li *et al.*, « Metabolic labelling of choline phospholipids probes ABCA3 transport in lamellar bodies », *Biochimica et Biophysica Acta (BBA) - Molecular and Cell Biology of Lipids*, vol. 1864, n° 12, p. 158516, déc. 2019, doi: 10.1016/j.bbalip.2019.158516.
- [28] Y. Matsumura, N. Ban, K. Ueda, et N. Inagaki, « Characterization and Classification of ATP-binding Cassette Transporter ABCA3 Mutants in Fatal Surfactant Deficiency », *J. Biol. Chem.*, vol. 281, n° 45, p. 34503-34514, oct. 2006, doi: 10.1074/jbc.M600071200.
- [29] Y. Matsumura, H. Sakai, M. Sasaki, N. Ban, et N. Inagaki, « ABCA3-mediated choline-phospholipids uptake into intracellular vesicles in A549 cells », *FEBS Letters*, vol. 581, n° 17, p. 3139-3144, juill. 2007, doi: 10.1016/j.febslet.2007.05.078.
- [30] S.-K. Park *et al.*, « Identification and characterization of a novel ABCA3 mutation », *Physiological Genomics*, vol. 40, n° 2, p. 94-99, oct. 2009, doi: 10.1152/physiolgenomics.00123.2009.
- [31] S. Shulenin, L. M. Noguee, T. Annilo, S. E. Wert, J. A. Whitsett, et M. Dean, « ABCA3 Gene Mutations in Newborns with Fatal Surfactant Deficiency », *New England Journal of Medicine*, vol. 350, n° 13, p. 1296-1303, mars 2004, doi: 10.1056/NEJMoa032178.
- [32] A. Agrawal *et al.*, « An intronic ABCA3 mutation responsible for respiratory disease », *Pediatr Res*, vol. 71, n° 6, p. 633-637, juin 2012, doi: 10.1038/pr.2012.21.
- [33] M. Williamson et C. Wallis, « Ten-year follow up of hydroxychloroquine treatment for ABCA3 deficiency », *Pediatric Pulmonology*, vol. 49, n° 3, p. 299-301, 2014, doi: 10.1002/ppul.22811.
- [34] S. Frixel *et al.*, « Homooligomerization of ABCA3 and its functional significance », *International Journal of Molecular Medicine*, vol. 38, n° 2, p. 558-566, août 2016, doi: 10.3892/ijmm.2016.2650.

- [35] M. Hallik, T. Annilo, et M.-L. Ilmoja, « Different course of lung disease in two siblings with novel ABCA3 mutations », *Eur J Pediatr*, vol. 173, n° 12, p. 1553-1556, déc. 2014, doi: 10.1007/s00431-013-2087-3.
- [36] F. Flamein *et al.*, « Molecular and cellular characteristics of ABCA3 mutations associated with diffuse parenchymal lung diseases in children », *Human Molecular Genetics*, vol. 21, n° 4, p. 765, févr. 2012, doi: 10.1093/hmg/ddr508.
- [37] S. Kinting *et al.*, « Functional rescue of misfolding ABCA3 mutations by small molecular correctors », *Hum Mol Genet*, vol. 27, n° 6, p. 943-953, mars 2018, doi: 10.1093/hmg/ddy011.
- [38] T. Akimoto *et al.*, « Hereditary interstitial lung diseases manifesting in early childhood in Japan », *Pediatric Research*, vol. 76, n° 5, Art. n° 5, nov. 2014, doi: 10.1038/pr.2014.114.
- [39] T. H. Garmany *et al.*, « Surfactant Composition and Function in Patients with ABCA3 Mutations », *Pediatric Research*, vol. 59, n° 6, p. 801-805, juin 2006, doi: 10.1203/01.pdr.0000219311.14291.df.
- [40] S. Thavagnanam, E. Cutz, D. Manson, L. M. Noguee, et S. D. Dell, « Variable clinical outcome of ABCA3 deficiency in two siblings », *Pediatric Pulmonology*, vol. 48, n° 10, p. 1035-1038, 2013, doi: 10.1002/ppul.22698.
- [41] J.-P. Gonçalves, L. Pinheiro, M. Costa, A. Silva, A. Gonçalves, et A. Pereira, « Novel ABCA3 mutations as a cause of respiratory distress in a term newborn », *Gene*, vol. 534, n° 2, p. 417-420, janv. 2014, doi: 10.1016/j.gene.2013.11.015.
- [42] H. Kitazawa *et al.*, « Interstitial lung disease in two brothers with novel compound heterozygous ABCA3 mutations », *Eur J Pediatr*, vol. 172, n° 7, p. 953-957, juill. 2013, doi: 10.1007/s00431-013-1977-8.
- [43] A. Hamvas *et al.*, « Inherited Surfactant Deficiency Caused by Uniparental Disomy of Rare Mutations in the Surfactant Protein-B and ATP Binding Cassette, Subfamily A, Member 3 Genes », *The Journal of Pediatrics*, vol. 155, n° 6, p. 854-859.e1, déc. 2009, doi: 10.1016/j.jpeds.2009.06.006.
- [44] T. Wittmann *et al.*, « Tools to explore ABCA3 mutations causing interstitial lung disease », *Pediatr Pulmonol.*, vol. 51, n° 12, p. 1284-1294, déc. 2016, doi: 10.1002/ppul.23471.
- [45] O. D. Saugstad *et al.*, « Novel mutations in the gene encoding ATP binding cassette protein member A3 (ABCA3) resulting in fatal neonatal lung disease », *Acta Paediatrica*, vol. 96, n° 2, p. 185-190, 2007, doi: 10.1111/j.1651-2227.2007.00016.x.
- [46] E. D. Manali *et al.*, « Bi-allelic missense ABCA3 mutations in a patient with childhood ILD who reached adulthood », *ERJ Open Res*, vol. 5, n° 3, juill. 2019, doi: 10.1183/23120541.00066-2019.

**Table S2. Existing variants in NBDs and IHs but not included in the manuscript (Table 1).**

| Nomenclature                                |                            |             | Epidemiologic data from gnomAD |                  | ClinVar | In silico prediction |                         | Aggregators                  |      |                   |               |
|---------------------------------------------|----------------------------|-------------|--------------------------------|------------------|---------|----------------------|-------------------------|------------------------------|------|-------------------|---------------|
| cDNA name                                   | Protein name               | rsID        | Allelic Freq. (all)            | Homozygous Count |         | SIFT <sup>a</sup>    | PolyPhen-2 <sup>b</sup> | Mutation Taster <sup>c</sup> | CADD | VarSome           | InterVar      |
| Variants reported in the IH1 motif          |                            |             |                                |                  |         |                      |                         |                              |      |                   |               |
| c.1A>C                                      | p.(Met1Leu)<br>M1L         | -           | -                              | 0                | -       | -                    | -                       | -                            | 19.8 | Likely Pathogenic | VUS           |
| Variants reported in the ICL1 and IH2 motif |                            |             |                                |                  |         |                      |                         |                              |      |                   |               |
| c.883C>T                                    | p.(Arg295Cys)<br>R295C     | rs755104182 | 0.002%                         | 0                | -       | D                    | B                       | D                            | 23.3 | VUS               | VUS           |
| Variants reported in the NBD1 motif         |                            |             |                                |                  |         |                      |                         |                              |      |                   |               |
| c.1721C>T                                   | p.(Thr574Ile)<br>T574I *   | -           | NA                             | 0                | -       | D                    | D                       | D                            | 24.3 | VUS               | VUS           |
| c.1814G>A                                   | p.(Arg605Gln)<br>R605Q     | rs760006956 | 0.00%                          | 0                | -       | D                    | D                       | D                            | 24.1 | Likely Benign     | VUS           |
| c.1887C>G                                   | p.(Phe629Leu)<br>F629L     | rs773466367 | 0.00%                          | 0                | -       | D                    | D                       | D                            | 24.7 | VUS               | VUS           |
| c.1999G>A                                   | p.(Gly667Arg)<br>G667R     | rs754159546 | 0.00%                          | 0                | -       | D                    | D                       | D                            | 25.1 | VUS               | VUS           |
| c.2003G>A                                   | p.(Gly668Asp)<br>G668D     | rs397518427 | NA                             | 0                | -       | D                    | D                       | D                            | 24.5 | VUS               | VUS           |
| Variants reported in the NBD2 motif         |                            |             |                                |                  |         |                      |                         |                              |      |                   |               |
| c.4393G>A                                   | p.(Asp1465Asn)<br>D1465N   | rs201955122 | 0.01%                          | 0                | -       | D                    | D                       | D                            | 28.3 | VUS               | VUS           |
| c.4420C>T                                   | p.(Arg1474Trp)<br>R1474W   | rs146709251 | 0.43%                          | 5                | Benign  | D                    | D                       | D                            | 23.3 | Benign            | Likely Benign |
| c.4547G>A <sup>d</sup>                      | p.(Ser1516Asn)<br>S1516N * | -           | -                              | 0                | -       | D                    | D                       | D                            | 35   | Pathogenic        | VUS           |

This table includes variants identified in heterozygous carriers, variants quoted in Wambach *et al.* (2012) found in RDS patients with no clinical data, and variants that have been studied in cell models but not reported in patients.

<sup>a</sup> The SIFT score ranges from 0.0 to 0.05 are considered deleterious and those ranges from 0.05 to 1.0 are predicted to be tolerated (benign). SIFT: B = tolerated, D = deleterious.

<sup>b</sup> The PolyPhen-2 score represents the probability that a substitution is damaging: scores ranging from 0.0 to 0.15 are predicted to be benign, scores ranging from 0.15 to 1.0 are predicted to be possibly damaging and scores ranging from 0.85 to 1.0 are predicted to be damaging. PolyPhen-2: B = benign, D = possibly damaging.

<sup>c</sup> MutationTaster : D for “Disease causing” and B for “Polymorphism”.

<sup>d</sup> Deduced base change. Only the amino-acid substitution was indicated in the publication.

\* Only found in RDS cohort from Wambach *et al.* (2012)

**Table S3. Important amino-acids in the NBDs**

|                      | NBD1                                                  | NBD2                                                    | Role                                                                                                                                                                                                              |
|----------------------|-------------------------------------------------------|---------------------------------------------------------|-------------------------------------------------------------------------------------------------------------------------------------------------------------------------------------------------------------------|
| <b>A loop</b>        | <b>F</b> <sup>539</sup>                               | <b>Y</b> <sup>1390</sup>                                | $\pi$ - $\pi$ interactions between the aromatic side chain and the ATP's adenine [1].                                                                                                                             |
| <b>Walker A</b>      | <b>G</b> <sup>566</sup> <b>HNGAGKT</b> <sup>573</sup> | <b>G</b> <sup>1416</sup> <b>HNGAGKT</b> <sup>1423</sup> | Interaction of the highly conserved lysine (K) residue of this motif with the phosphate groups of the ATP molecule [2].                                                                                           |
| <b>Q loop</b>        | <b>Q</b> <sup>613</sup>                               | <b>Q</b> <sup>1463</sup>                                | Phosphate sensor acting acts as an intermediate between TMDs and NBDs, implicated in sub-domains rotation during transport cycle [3], [4].                                                                        |
| <b>ABC signature</b> | <b>L</b> <sup>665</sup> <b>SGGM</b> <sup>669</sup>    | <b>Y</b> <sup>1515</sup> <b>SGGN</b> <sup>1519</sup>    | ATP positioning and fixation during hydrolysis and also for communication between substrate binding sites. It forms hydrogen bounds with ribose and $\gamma$ -phosphate of ATP [5], [6].                          |
| <b>Walker B</b>      | <b>V</b> <sup>685</sup> <b>IFLDE</b> <sup>690</sup>   | <b>V</b> <sup>1535</sup> <b>IFLDE</b> <sup>1540</sup>   | Glu (E) residue is considered as a catalytic base of ATP hydrolysis since a mutation trigger a reduced ATPase activity [7]. It links the water molecule, while Asp (D) residue interacts with magnesium moieties. |
| <b>D loop</b>        | <b>E</b> <sup>690</sup> <b>PTSGMD</b> <sup>696</sup>  | <b>E</b> <sup>1540</sup> <b>PSTGMD</b> <sup>1546</sup>  | Involved in the communication between the two NBDs allowing the coupling of ATP hydrolysis with substrate transport [8].                                                                                          |
| <b>H loop</b>        | <b>H</b> <sup>721</sup>                               | <b>H</b> <sup>1572</sup>                                | Interaction with the $\gamma$ -phosphate of ATP, and communication between the NBD monomers [9], [10].                                                                                                            |

**Table S4 :** UniProt identifiers and accession numbers of human ABCA proteins considered in this study

| UniProt identifier | UniProt accession number |
|--------------------|--------------------------|
| ABCA1              | O95477                   |
| ABCA2              | Q9BZC7                   |
| ABCA4              | P78363                   |
| ABCA7              | Q8IZY2                   |
| ABCAC (ABCA12)     | Q86UK0                   |
| ABCAD (ABCA13)     | Q86UQ4                   |
| ABCA3              | Q99758                   |
| ABCA5              | Q8WW27                   |
| ABCA6              | Q8N139                   |
| ABCA8              | Q94911                   |
| ABCA9              | Q8IUA7                   |
| ABCAA (ABCA10)     | Q8WWZ4                   |
